# Supplementary material
Source: PubMed Central journal article supplement (PMC7896327)
Supplement: pnas.2004523118.sapp.pdf [file pnas.2004523118.sapp.pdf]

**Supplementary Information for**

**Multisensory interactions regulate feeding behavior  
in *Drosophila***

Soo Min Oh, Kyunghwa Jeong, Jeong Taeg Seo, and Seok Jun Moon

Corresponding Author: Seok Jun Moon

Email: [sjmoon@yuhs.ac](mailto:sjmoon@yuhs.ac)

This PDF file includes:

Supplementary text Figures S1 to S8

Legends for Movies S1 and S2

Table S1

SI Reference

**Fig. S1**

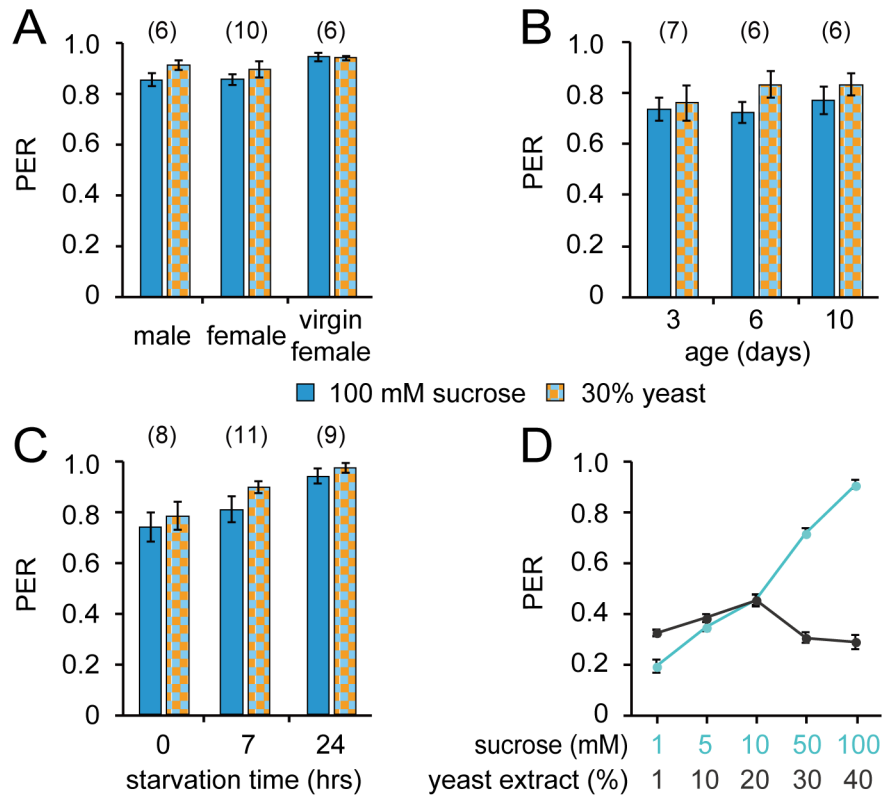

**Fig. S1. Effects of various conditions on yeast odor-evoked PER.**

(A-C) PER evoked by yeast in flies under different conditions. (A) Sex and mating. (B) Aging.

(C) Starvation time. n is indicated above the bar. Unpaired Student's *t*-tests or Mann-Whitney *U*-

tests for A-C. (D) PER evoked by various concentrations of yeast extract. The data for PER

induced by sucrose are the same as those in Fig. 1B. n=6–10. All data are presented as means  $\pm$

SEM.

**Fig. S2**

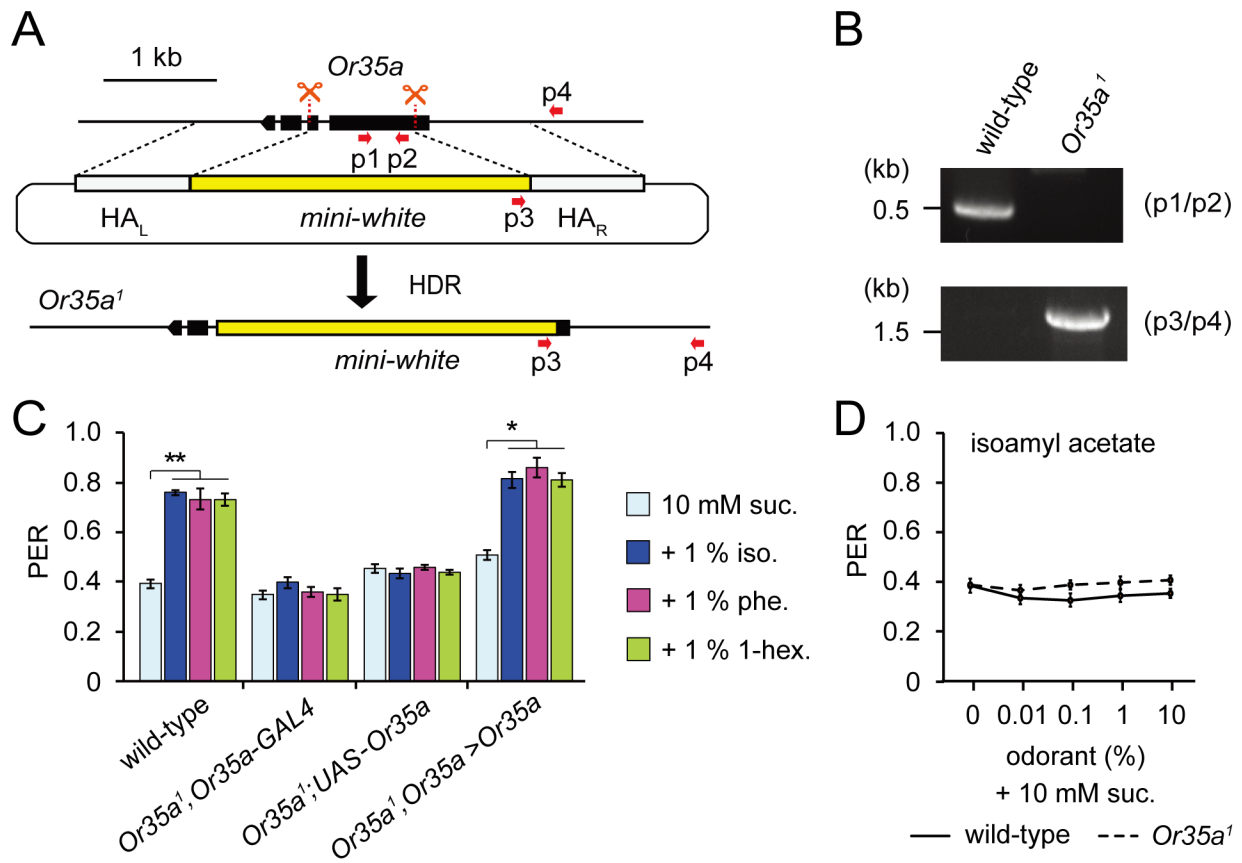

**Fig. S2. *Or35a*<sup>1</sup> flies and the modified PER evoked by sucrose and volatile compounds.** (A) Schematic showing the *Or35a* locus and the strategy for making *Or35a*<sup>1</sup> flies using the CRISPR/Cas9 system combined with homology-directed repair (HDR). The black boxes indicate exons. The orange scissors indicate the guide RNA targeting sites cut by the Cas9 nuclease. (B) The deletion of the *Or35a* coding sequence was confirmed by genomic PCR using the indicated primers (p1, p2, p3, p4; red arrows in (A)). (C) Modified PER using sucrose and the indicated volatile compounds. iso; isoamyl alcohol, phe; phenylethyl alcohol, 1-hex; 1-hexanol. Genotypes of tested flies are indicated. n=6. One-way ANOVAs with Tukey *post-hoc* tests or Kruskal-Wallis with Mann-Whitney *U*-tests. The asterisks indicate statistically significant differences

from PER evoked by sucrose alone.  $*p < 0.01$ ,  $**p < 0.001$ . (D) Modified PER using sucrose and isoamyl acetate.  $n=6$ . Unpaired Student's  $t$ -tests or Mann-Whitney  $U$ -tests. All data are presented as means  $\pm$  SEM.

**Fig. S3**

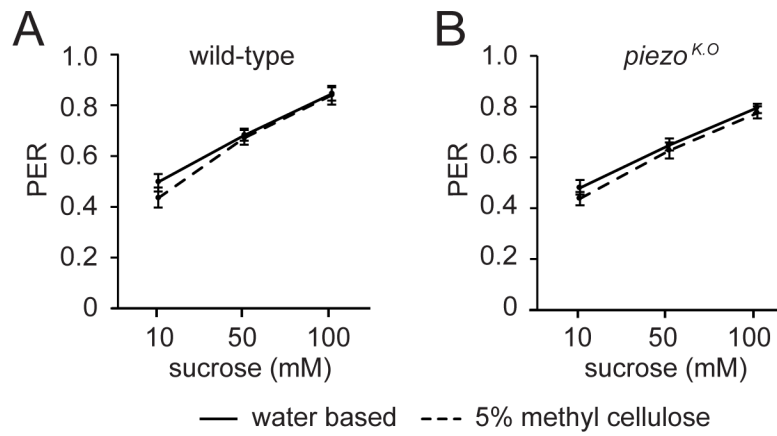

**Fig. S3. Effect of food viscosity on sucrose-evoked PER.** (A-B) PER evoked by water based- and 5% methyl cellulose based-sucrose in wild-type (A) and *piezo*<sup>K.O</sup> flies (B) by touching the legs. n=6–12. All data are presented as means  $\pm$  SEM. Unpaired Student's *t*-tests.

**Fig. S4**

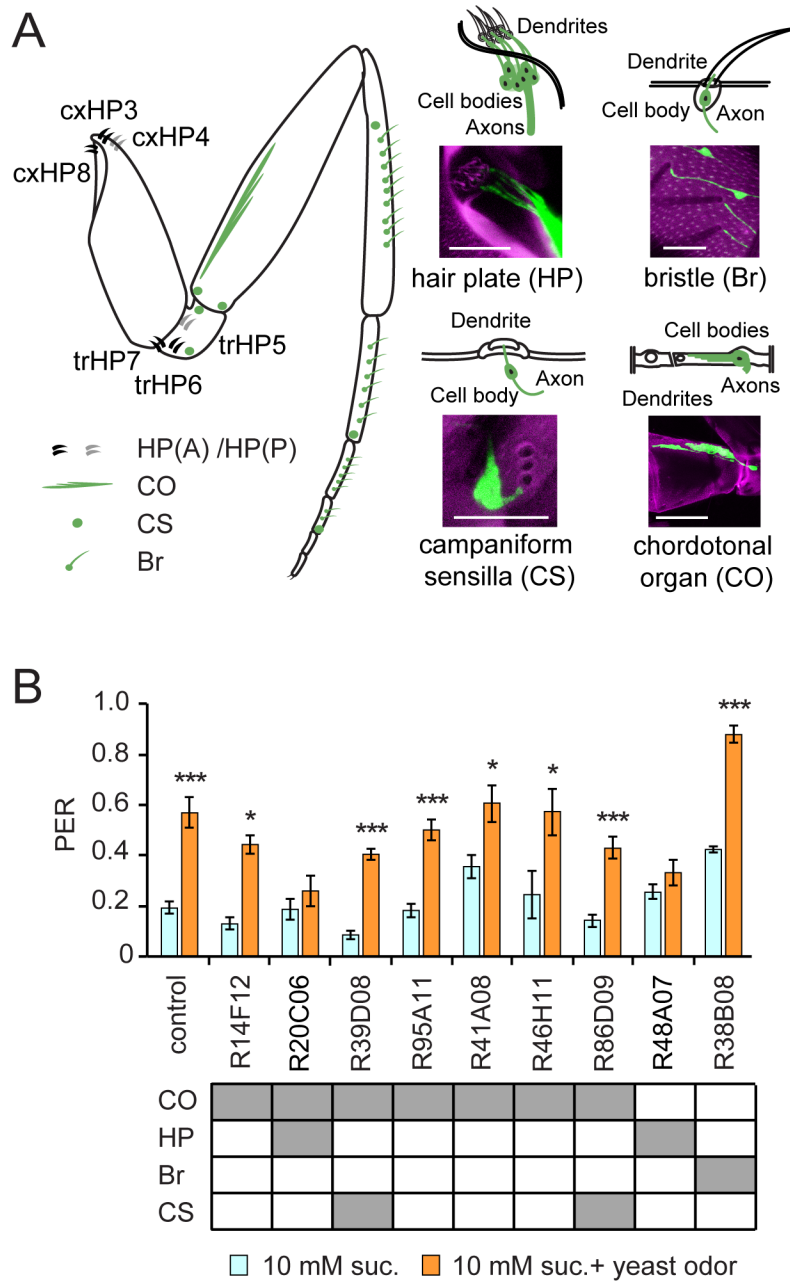

**Fig. S4. Mechanosensory organs are involved in yeast odor-enhanced PER.** (A) Schematics of the mechanosensory organs of the leg. Hair plate (HP), bristle (Br), campaniform sensilla (CS), and chordotonal organ (CO). There are three hair plates on the coxa (cxHP) and three hair

plates on the trochanter (trHP) in specific locations of the foreleg. Each distinct number was assigned based on the number of neurons innervating the cluster. Anterior and posterior HPs were marked with black and gray, respectively. The schematics of each type of mechanosensory organ were modified from Tuthill and Wilson, 2016 (1). Scale bar, 25  $\mu\text{m}$ . (B) Screening of mechanosensory organs for their roles in yeast odor-enhanced PER. Mechanosensory organs expressing *GAL4* lines were crossed to *UAS-Kir2.1* to silence mechanosensory neurons. n=4–8. All data are presented as means  $\pm$  SEM. Unpaired Student's *t*-tests and Mann-Whitney *U*-tests. The asterisks indicate statistically significant differences from PER evoked by sucrose alone. \**p* < 0.05, \*\*\**p* < 0.001.

**Fig. S5**

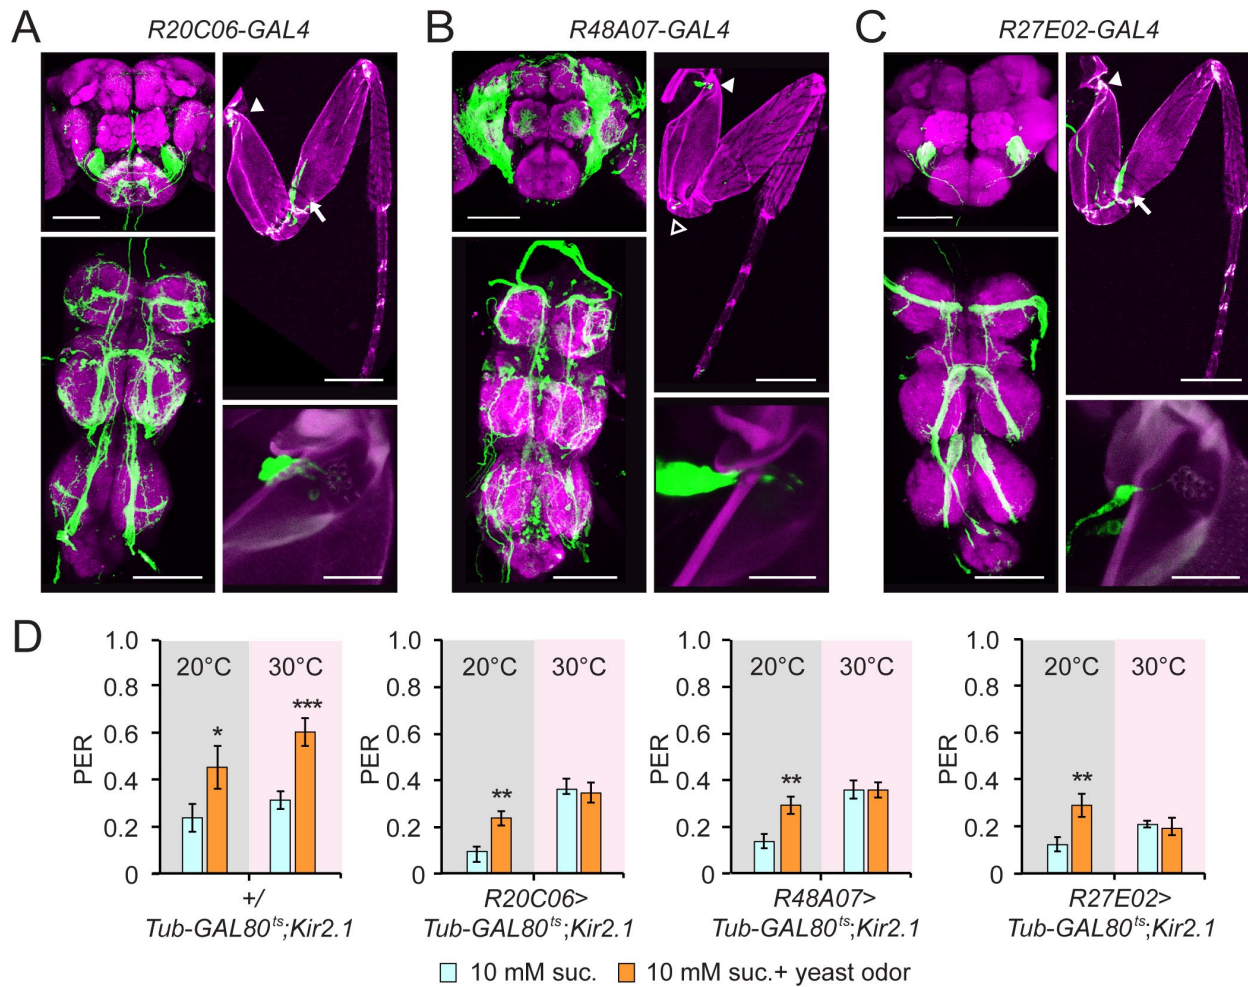

**Fig. S5. Leg hair plates are involved in yeast odor-enhanced PER.** (A-C) Expression of hair plate-expressing *GAL4* drivers in the brain, ventral nerve cord (VNC), and legs. VNCs and brains were stained with rabbit anti-GFP (green) and nc82 (magenta). Magenta in the leg images shows cuticle auto-fluorescence. White arrowheads indicate the hair plate shown at a higher magnification below. Arrows and the unfilled arrowhead indicate the chordotonal organs and an additional hair plate, respectively. Scale bars: 100  $\mu$ m in the brain and VNC, 200  $\mu$ m in the leg, 25  $\mu$ m in the magnified hair plate view. (D) Effect of silencing hair plate mechanosensory



neurons on yeast odor-enhanced PER.  $n=6-11$ . All data are presented as means  $\pm$  SEM. Unpaired Student's  $t$ -tests or Mann-Whitney  $U$ -tests. The asterisks indicate statistically significant differences from PER evoked by sucrose alone.  $*p < 0.05$ ,  $**p < 0.01$ ,  $***p < 0.001$ .

**Fig. S6**

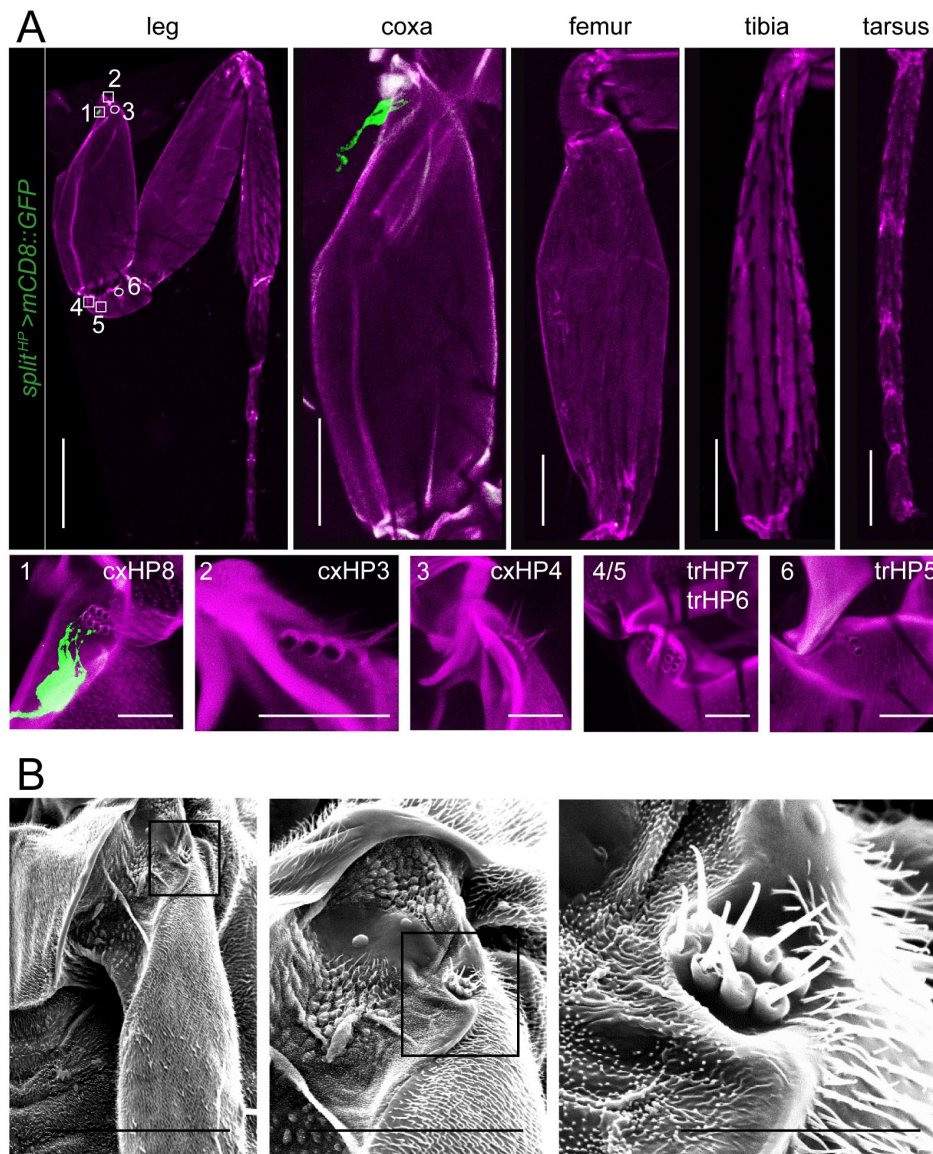

**Fig. S6. *split<sup>HP</sup>*-expressing coxa hair plate MNs in the foreleg.** (A) High resolution image of leg segments of *split<sup>HP</sup>>mCD8::GFP* flies. Only eight MNs in cxHP8 are labeled in *split<sup>HP</sup>>mCD8::GFP* flies. Scale bars: leg, 200  $\mu$ m; coxa, femur, tibia, and tarsus, 100  $\mu$ m; hair plate, 25  $\mu$ m. (B) Scanning electron micrographs of the coxa hair plate, cxHP8. Scale bars: left, 200  $\mu$ m; middle, 100  $\mu$ m; right, 20  $\mu$ m. Black boxes indicate cxHP8.

**Fig. S7**

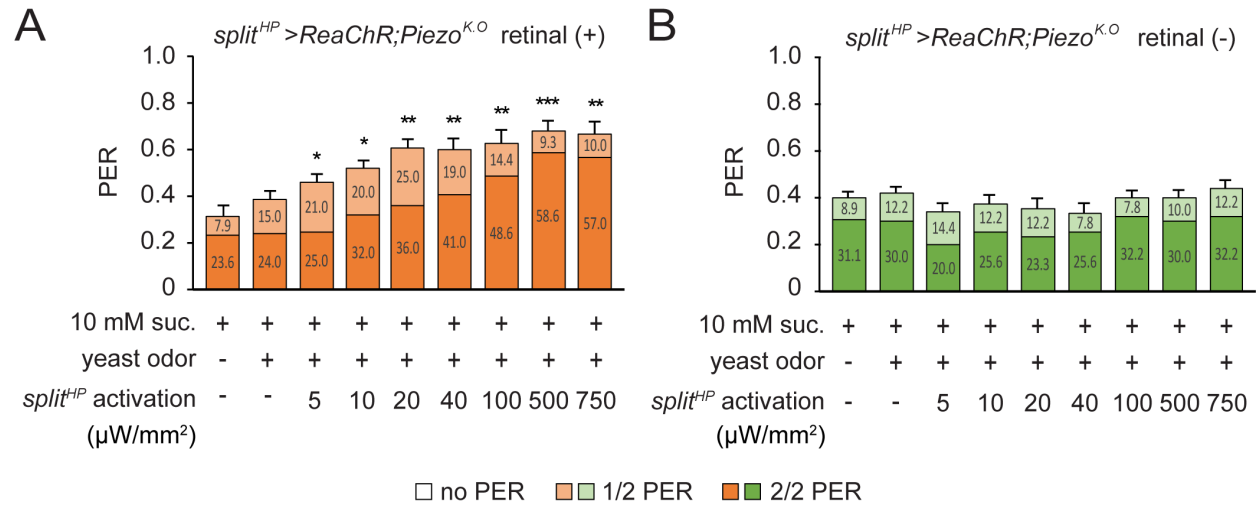

**Fig. S7. Relationship between MN activation intensity and the percentage of PER evoked by taste paired with yeast odor.** Modified PER combined with optogenetic activation of *split<sup>HP</sup>* MNs was performed in the indicated genotypes with (A) or without (B) retinal. A wide range of intensities of red light (617 nm) were applied to activate *split<sup>HP</sup>* MNs. Proportions of the number of PER recorded are indicated by the different orange and green shades (1/2 PER: one PER upon two optogenetic stimulations; 2/2 PER: two PER upon two optogenetic stimulations). n=9–14. All data are presented as means ± SEM. Unpaired Student's *t*-tests or Mann-Whitney *U*-tests. The asterisks indicate statistically significant differences between PER of retinal (+) and retinal (-) fed flies. \**p* < 0.05, \*\**p* < 0.01, \*\*\**p* < 0.001.

**Fig. S8**

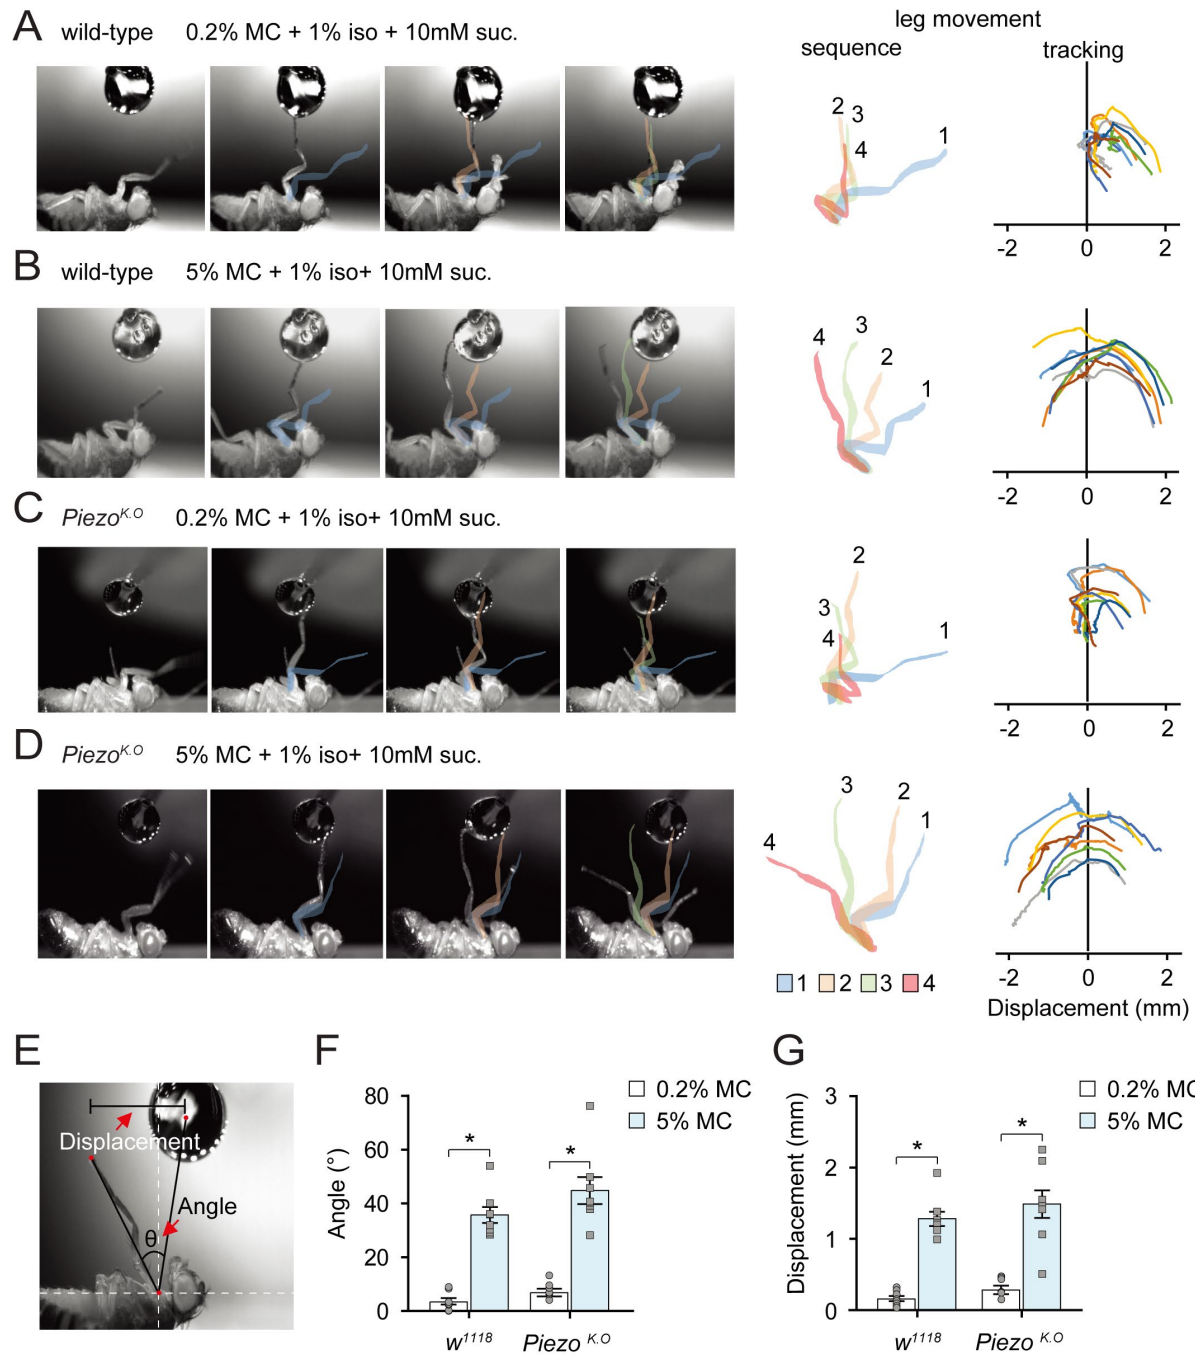

**Fig. S8. Distinct leg motions in response to different food viscosities.** Leg movements during PER evoked by the indicated foods in the indicated genotypes. Wild-type (*A and B*) and *Piezo*<sup>K.O</sup>

(C and D). The left colored “sequence” diagrams are superimposed outlines of the left leg, representing the initial (1) to final (4) positions of leg movement. The right colored "tracking" diagrams show the superimposed displacement patterns from distinct flies. PER was observed only in the wild type presented droplets containing 0.2% methyl cellulose with 1% isoamyl alcohol in 10 mM sucrose. (E-G) Quantification of leg movement measuring maximum displacement (i.e., the distance between the center of a droplet and the tip of the tarsus as it reached maximum displacement) and degree of maximum leg rotation (i.e., the largest angle formed by the leg from the center of a droplet with the vertex located at the thoraco-coxal joint). n=8. All data are presented as means  $\pm$  SEM. Unpaired Student's *t*-tests and Mann-Whitney *U*-tests. The asterisks indicate statistically significant differences from viscosity, 0.2% MC or 5% MC. \**p* < 0.001.

**Movie S1.** Leg movement during PER assay with 0.2% methyl cellulose with 1% isoamyl alcohol in 10 mM sucrose in wild-type. PER was evoked.

**Movie S2.** Leg movement during PER assay with 5% methyl cellulose with 1% isoamyl alcohol in 10 mM sucrose in wild-type. PER was not observed.

Supplementary Table S1. Statistic test results.

| Figure                                               | Group                                                                       | Method                                  | Value                             |                                   |         |
|------------------------------------------------------|-----------------------------------------------------------------------------|-----------------------------------------|-----------------------------------|-----------------------------------|---------|
| Figure 1<br>* <i>p</i> < 0.01<br>** <i>p</i> < 0.001 | C                                                                           | 10 mM suc.                              | ANOVA                             | 0.2600                            |         |
|                                                      |                                                                             | 100 mM suc.                             | Kruskal-Wallis                    | 0.8700                            |         |
|                                                      |                                                                             | yeast                                   | Kru-Mann-Bon ( $\alpha < 0.017$ ) | 0.0030                            |         |
|                                                      | D                                                                           | 10 mM suc.                              | Kruskal-Wallis                    | 0.2000                            |         |
|                                                      |                                                                             | 100 mM suc.                             | Kruskal-Wallis                    | 0.2200                            |         |
|                                                      |                                                                             | yeast                                   | ANOVA with Turkey                 | <0.0001                           |         |
|                                                      | E                                                                           | <i>w</i> <sup>118</sup>                 | ANOVA with Turkey                 | <0.0001                           |         |
|                                                      | Figure 2<br>* <i>p</i> < 0.05<br>** <i>p</i> < 0.01<br>*** <i>p</i> < 0.001 | B                                       | +/ <i>Kir2.1</i>                  | Unpaired Student's <i>t</i> -test | <0.0001 |
|                                                      |                                                                             |                                         | <i>Or35a-GAL4</i>                 | Unpaired Student's <i>t</i> -test | 0.4521  |
| <i>Or67a-GAL4</i>                                    |                                                                             |                                         | Unpaired Student's <i>t</i> -test | <0.0001                           |         |
| <i>Or67b-GAL4</i>                                    |                                                                             |                                         | Unpaired Student's <i>t</i> -test | 0.0003                            |         |
| <i>Or69a-GAL4</i>                                    |                                                                             |                                         | Unpaired Student's <i>t</i> -test | <0.0001                           |         |
| <i>Or9a-GAL4</i>                                     |                                                                             |                                         | Unpaired Student's <i>t</i> -test | <0.0001                           |         |
| <i>Or43b-GAL4</i>                                    |                                                                             |                                         | Unpaired Student's <i>t</i> -test | <0.0001                           |         |
| <i>Or7a-GAL4</i>                                     |                                                                             |                                         | Unpaired Student's <i>t</i> -test | <0.0001                           |         |
| <i>Or22a-GAL4</i>                                    |                                                                             |                                         | Unpaired Student's <i>t</i> -test | 0.0001                            |         |
| C                                                    |                                                                             | <i>w</i> <sup>118</sup>                 | Mann-Whitney <i>U</i> -test       | 0.0020                            |         |
|                                                      |                                                                             | <i>Or35a<sup>1</sup>,Or35a-GAL4</i>     | Unpaired Student's <i>t</i> -test | 0.0872                            |         |
|                                                      |                                                                             | <i>Or35a<sup>1</sup>;UAS-Or35a</i>      | Mann-Whitney <i>U</i> -test       | 0.2790                            |         |
|                                                      |                                                                             | <i>Or35a<sup>1</sup>,Or35a&gt;Or35a</i> | Unpaired Student's <i>t</i> -test | <0.0001                           |         |
| D                                                    |                                                                             | <i>w</i> <sup>118</sup>                 | Unpaired Student's <i>t</i> -test | <0.0001                           |         |
|                                                      |                                                                             | <i>Or35a-GAL4;Orco<sup>1</sup></i>      | Unpaired Student's <i>t</i> -test | 0.2580                            |         |
|                                                      |                                                                             | <i>UAS-Orco;Orco<sup>1</sup></i>        | Mann-Whitney <i>U</i> -test       | 0.3520                            |         |
|                                                      |                                                                             | <i>Or35a&gt;Orco;Orco<sup>1</sup></i>   | Unpaired Student's <i>t</i> -test | 0.0001                            |         |
| E<br>Isoamyl Alcohol (IA)                            |                                                                             | 10 mM suc.                              | Unpaired Student's <i>t</i> -test | 0.0959                            |         |
|                                                      |                                                                             | 10 mM suc. + 0.01% IA                   | Mann-Whitney <i>U</i> -test       | 0.3940                            |         |
|                                                      |                                                                             | 10 mM suc. + 0.1% IA                    | Unpaired Student's <i>t</i> -test | 0.0140                            |         |
|                                                      |                                                                             | 10 mM suc. + 1% IA                      | Unpaired Student's <i>t</i> -test | 0.0005                            |         |
|                                                      |                                                                             | 10 mM suc. + 10% IA                     | Unpaired Student's <i>t</i> -test | 0.0060                            |         |
| E<br>Phenylethly                                     |                                                                             | 10 mM suc.                              | Mann-Whitney <i>U</i> -test       | 0.5890                            |         |
|                                                      |                                                                             | 10 mM suc. + 0.01% PA                   | Mann-Whitney <i>U</i> -test       | 0.0020                            |         |
|                                                      |                                                                             | 10 mM suc. + 0.1% PA                    | Mann-Whitney <i>U</i> -test       | 0.0020                            |         |

|                                                      |                                                      |                                                       |                                   |                                   |
|------------------------------------------------------|------------------------------------------------------|-------------------------------------------------------|-----------------------------------|-----------------------------------|
|                                                      | Alcohol (PA)                                         | 10 mM suc. + 1% PA                                    | Unpaired Student's <i>t</i> -test | <0.0001                           |
|                                                      |                                                      | 10 mM suc. + 10% PA                                   | Unpaired Student's <i>t</i> -test | 0.0001                            |
|                                                      | E                                                    | 10 mM suc.                                            | Unpaired Student's <i>t</i> -test | 0.1125                            |
|                                                      |                                                      | 10 mM suc. + 0.01% HA                                 | Unpaired Student's <i>t</i> -test | 0.1158                            |
|                                                      |                                                      | 10 mM suc. + 0.1% HA                                  | Unpaired Student's <i>t</i> -test | 0.0020                            |
|                                                      |                                                      | 10 mM suc. + 1% HA                                    | Unpaired Student's <i>t</i> -test | <0.0001                           |
|                                                      |                                                      | 10 mM suc. + 10% HA                                   | Unpaired Student's <i>t</i> -test | 0.0102                            |
|                                                      | F                                                    | retinal (-)                                           | Kru-Mann-Bon ( $\alpha < 0.017$ ) | 0.0010                            |
|                                                      |                                                      | retinal (+)                                           | ANOVA with Turkey                 | <0.0001                           |
|                                                      | Figure 3<br>* <i>p</i> < 0.01<br>** <i>p</i> < 0.001 | A                                                     | 10 mM suc. ± odor                 | Unpaired Student's <i>t</i> -test |
| 50 mM suc. ± odor                                    |                                                      |                                                       | Mann-Whitney <i>U</i> -test       | 0.0060                            |
| 100 mM suc. ± odor                                   |                                                      |                                                       | Mann-Whitney <i>U</i> -test       | 0.1640                            |
| B                                                    |                                                      | 10 mM suc. ± odor                                     | Mann-Whitney <i>U</i> -test       | 0.3330                            |
|                                                      |                                                      | 50 mM suc. ± odor                                     | Unpaired Student's <i>t</i> -test | 0.0898                            |
|                                                      |                                                      | 100 mM suc. ± odor                                    | Unpaired Student's <i>t</i> -test | 0.0716                            |
| C                                                    |                                                      | 10 mM suc. with 0.2% MC ± odor                        | Mann-Whitney <i>U</i> -test       | 0.0020                            |
|                                                      |                                                      | 10 mM suc. with 1% MC ± odor                          | Mann-Whitney <i>U</i> -test       | <0.0001                           |
|                                                      |                                                      | 10 mM suc. with 2% MC ± odor                          | Mann-Whitney <i>U</i> -test       | <0.0001                           |
|                                                      |                                                      | 10 mM suc. with 3% MC ± odor                          | Mann-Whitney <i>U</i> -test       | 0.0020                            |
|                                                      |                                                      | 10 mM suc. with 4% MC ± odor                          | Mann-Whitney <i>U</i> -test       | 0.0020                            |
|                                                      |                                                      | 10 mM suc. with 5% MC ± odor                          | Mann-Whitney <i>U</i> -test       | 0.8630                            |
| D                                                    |                                                      | <i>w<sup>1118</sup></i>                               | Unpaired Student's <i>t</i> -test | <0.0001                           |
|                                                      |                                                      | <i>pain<sup>1</sup></i>                               | Unpaired Student's <i>t</i> -test | <0.0001                           |
|                                                      |                                                      | <i>NompC<sup>f00642</sup></i>                         | Mann-Whitney <i>U</i> -test       | <0.0001                           |
|                                                      |                                                      | <i>nan<sup>36a</sup></i>                              | Unpaired Student's <i>t</i> -test | 0.1179                            |
|                                                      |                                                      | <i>iav<sup>3621</sup></i>                             | Mann-Whitney <i>U</i> -test       | 0.5790                            |
|                                                      |                                                      | <i>piezo<sup>K.O</sup></i>                            | Unpaired Student's <i>t</i> -test | 0.2566                            |
| Figure 4<br>* <i>p</i> < 0.01<br>** <i>p</i> < 0.001 | B                                                    | +/ <i>Kir2.1</i>                                      | Unpaired Student's <i>t</i> -test | <0.0001                           |
|                                                      |                                                      | <i>split<sup>HP</sup>&gt;Kir2.1</i>                   | Unpaired Student's <i>t</i> -test | 0.2536                            |
|                                                      | C                                                    | +/ <i>shi<sup>ts</sup></i> (20 °C)                    | Unpaired Student's <i>t</i> -test | 0.0002                            |
|                                                      |                                                      | <i>split<sup>HP</sup>/+</i> (20 °C)                   | Mann-Whitney <i>U</i> -test       | 0.0020                            |
|                                                      |                                                      | <i>split<sup>HP</sup>&gt;shi<sup>ts</sup></i> (20 °C) | Unpaired Student's <i>t</i> -test | <0.0001                           |
|                                                      |                                                      | +/ <i>shi<sup>ts</sup></i> (30 °C)                    | Unpaired Student's <i>t</i> -test | <0.0001                           |
|                                                      |                                                      | <i>split<sup>HP</sup>/+</i> (30 °C)                   | Unpaired Student's <i>t</i> -test | 0.0001                            |
|                                                      |                                                      | <i>split<sup>HP</sup>&gt;shi<sup>ts</sup></i>         | Unpaired Student's <i>t</i> -test | 0.3996                            |
|                                                      | D                                                    | <i>iav RNAi/+</i>                                     | Unpaired Student's <i>t</i> -test | 0.0002                            |



|                                |                                |                                                                          |                                    |                                    |
|--------------------------------|--------------------------------|--------------------------------------------------------------------------|------------------------------------|------------------------------------|
| Figure 5<br>* <i>p</i> < 0.001 |                                | <i>split</i> <sup>HP</sup> > <i>iav</i> RNAi                             | Unpaired Student's <i>t</i> -test  | 0.4552                             |
|                                |                                | <i>nan</i> RNAi/+                                                        | Unpaired Student's <i>t</i> -test  | <0.0001                            |
|                                |                                | <i>split</i> <sup>HP</sup> > <i>nan</i> RNAi                             | Unpaired Student's <i>t</i> -test  | 0.2158                             |
|                                |                                | <i>piezo</i> RNAi/+                                                      | Unpaired Student's <i>t</i> -test  | <0.0001                            |
|                                |                                | <i>split</i> <sup>HP</sup> > <i>piezo</i> RNAi                           | Unpaired Student's <i>t</i> -test  | 0.4010                             |
|                                | E                              | <i>w</i> <sup>1118</sup>                                                 | Unpaired Student's <i>t</i> -test  | 0.0001                             |
|                                |                                | <i>piezo</i> <sup>K.O.</sup> ; <i>split</i> <sup>HP</sup>                | Unpaired Student's <i>t</i> -test  | 0.3151                             |
|                                |                                | <i>piezo</i> <sup>K.O.</sup> ;UAS- <i>piezo</i>                          | Unpaired Student's <i>t</i> -test  | 0.2405                             |
|                                |                                | <i>piezo</i> <sup>K.O.</sup> ; <i>split</i> <sup>HP</sup> > <i>piezo</i> | Unpaired Student's <i>t</i> -test  | 0.0002                             |
|                                | F                              | body                                                                     | ANOVA with Turkey                  | <0.0001                            |
|                                |                                | head                                                                     | ANOVA with Turkey                  | <0.0001                            |
|                                | G                              | +/ <i>Kir2.1</i> 0.2% MC                                                 | Kru-Mann-Bon ( $\alpha < 0.0167$ ) | <0.0001                            |
|                                |                                | +/ <i>Kir2.1</i> 5% MC                                                   | ANOVA with Turkey                  | <0.0001                            |
|                                |                                | <i>split</i> <sup>HP</sup> > <i>Kir2.1</i> 0.2% MC                       | Kruskal-Wallis                     | 0.142                              |
|                                |                                | <i>split</i> <sup>HP</sup> > <i>Kir2.1</i> 5% MC                         | Kruskal-Wallis                     | 0.08                               |
|                                | Figure 5<br>* <i>p</i> < 0.001 | A                                                                        | retinal (-)                        | Kru-Mann-Bon ( $\alpha < 0.0023$ ) |
|                                |                                | retinal (+)                                                              | Kru-Mann-Bon ( $\alpha < 0.0023$ ) | <0.0001                            |
| B                              |                                | retinal (-)                                                              | Kru-Mann-Bon ( $\alpha < 0.0083$ ) | <0.0001                            |
|                                |                                | retinal (+)                                                              | Kru-Mann-Bon ( $\alpha < 0.0083$ ) | <0.0001                            |

| Supplemental Figure                                   | Group | Method                                                  | Value                              |         |
|-------------------------------------------------------|-------|---------------------------------------------------------|------------------------------------|---------|
| Figure S1                                             | A     | male                                                    | Mann-Whitney <i>U</i> -test        | 0.1320  |
|                                                       |       | female                                                  | Unpaired Student's <i>t</i> -test  | 0.1497  |
|                                                       |       | virgin                                                  | Mann-Whitney <i>U</i> -test        | 0.8180  |
|                                                       | B     | 3 days                                                  | Unpaired Student's <i>t</i> -test  | 0.3862  |
|                                                       |       | 6 days                                                  | Unpaired Student's <i>t</i> -test  | 0.0670  |
|                                                       |       | 10 days                                                 | Unpaired Student's <i>t</i> -test  | 0.1949  |
|                                                       | C     | 0 hr                                                    | Unpaired Student's <i>t</i> -test  | 0.2987  |
|                                                       |       | 7 hrs                                                   | Mann-Whitney <i>U</i> -test        | 0.2700  |
|                                                       |       | 24 hrs                                                  | Mann-Whitney <i>U</i> -test        | 0.2970  |
| Figure S2<br>* <i>p</i> < 0.01<br>** <i>p</i> < 0.001 | C     | <i>w</i> <sup>1118</sup>                                | ANOVA with Turkey                  | <0.0001 |
|                                                       |       | <i>Or35a</i> <sup>1</sup> , <i>Or35a</i> - <i>GAL4</i>  | ANOVA                              | 0.3057  |
|                                                       |       | <i>Or35a</i> <sup>1</sup> ;UAS- <i>Or35a</i>            | Kruskal-Wallis                     | 0.6910  |
|                                                       |       | <i>Or35a</i> <sup>1</sup> , <i>Or35a</i> > <i>Or35a</i> | Kru-Mann-Bon ( $\alpha < 0.0083$ ) | 0.0030  |
|                                                       | D     | 10 mM suc.                                              | Mann-Whitney <i>U</i> -test        | 0.8180  |

|                                                                              |                       |                                                    |                                   |         |
|------------------------------------------------------------------------------|-----------------------|----------------------------------------------------|-----------------------------------|---------|
|                                                                              | Isoamyl Acetate (IAC) | 10 mM suc. + 0.01% IAC                             | Unpaired Student's <i>t</i> -test | 0.1640  |
|                                                                              |                       | 10 mM suc. + 0.1% IAC                              | Mann-Whitney <i>U</i> -test       | 0.3940  |
|                                                                              |                       | 10 mM suc. + 1% IAC                                | Unpaired Student's <i>t</i> -test | 0.0787  |
|                                                                              |                       | 10 mM suc. + 10% IAC                               | Mann-Whitney <i>U</i> -test       | 0.1800  |
| Figure S3                                                                    | A                     | 10 mM suc. ± 5% MC                                 | Unpaired Student's <i>t</i> -test | 0.1226  |
|                                                                              |                       | 50 mM suc. ± 5% MC                                 | Unpaired Student's <i>t</i> -test | 0.3919  |
|                                                                              |                       | 100 mM suc. ± 5% MC                                | Unpaired Student's <i>t</i> -test | 0.4390  |
|                                                                              | B                     | 10 mM suc. ± 5% MC                                 | Unpaired Student's <i>t</i> -test | 0.1483  |
|                                                                              |                       | 50 mM suc. ± 5% MC                                 | Unpaired Student's <i>t</i> -test | 0.2648  |
|                                                                              |                       | 100 mM suc. ± 5% MC                                | Unpaired Student's <i>t</i> -test | 0.2958  |
| Figure S4<br>* <i>p</i> < 0.05<br>** <i>p</i> < 0.01<br>*** <i>p</i> < 0.001 | B                     | +/ <i>Kir2.1</i>                                   | Unpaired Student's <i>t</i> -test | 0.0005  |
|                                                                              |                       | <i>R14F12-GAL4</i>                                 | Mann-Whitney <i>U</i> -test       | 0.0290  |
|                                                                              |                       | <i>R20C06-GAL4</i>                                 | Unpaired Student's <i>t</i> -test | 0.1692  |
|                                                                              |                       | <i>R39D08-GAL4</i>                                 | Mann-Whitney <i>U</i> -test       | <0.0001 |
|                                                                              |                       | <i>R95A11-GAL4</i>                                 | Unpaired Student's <i>t</i> -test | <0.0001 |
|                                                                              |                       | <i>R41A08-GAL4</i>                                 | Unpaired Student's <i>t</i> -test | 0.0125  |
|                                                                              |                       | <i>R46H11-GAL4</i>                                 | Unpaired Student's <i>t</i> -test | 0.0229  |
|                                                                              |                       | <i>R86D09-GAL4</i>                                 | Unpaired Student's <i>t</i> -test | 0.0006  |
|                                                                              |                       | <i>R48A07-GAL4</i>                                 | Unpaired Student's <i>t</i> -test | 0.1024  |
|                                                                              |                       | <i>R38B08-GAL4</i>                                 | Unpaired Student's <i>t</i> -test | <0.0001 |
| Figure S5<br>* <i>p</i> < 0.05<br>** <i>p</i> < 0.01<br>*** <i>p</i> < 0.001 | D                     | +/ <i>Tub-GAL80<sup>ts</sup>;Kir2.1</i> (20°C)     | Unpaired Student's <i>t</i> -test | 0.0411  |
|                                                                              |                       | +/ <i>Tub-GAL80<sup>ts</sup>;Kir2.1</i> (30°C)     | Mann-Whitney <i>U</i> -test       | <0.0001 |
|                                                                              |                       | <i>R20&gt;Tub-GAL80<sup>ts</sup>;Kir2.1</i> (20°C) | Unpaired Student's <i>t</i> -test | 0.0017  |
|                                                                              |                       | <i>R20&gt;Tub-GAL80<sup>ts</sup>;Kir2.1</i> (30°C) | Unpaired Student's <i>t</i> -test | 0.3931  |
|                                                                              |                       | <i>R48&gt;Tub-GAL80<sup>ts</sup>;Kir2.1</i> (20°C) | Unpaired Student's <i>t</i> -test | 0.0047  |
|                                                                              |                       | <i>R48&gt;Tub-GAL80<sup>ts</sup>;Kir2.1</i> (30°C) | Unpaired Student's <i>t</i> -test | 0.4916  |
|                                                                              |                       | <i>R27&gt;Tub-GAL80<sup>ts</sup>;Kir2.1</i> (20°C) | Unpaired Student's <i>t</i> -test | 0.0080  |
|                                                                              |                       | <i>R27&gt;Tub-GAL80<sup>ts</sup>;Kir2.1</i> (30°C) | Mann-Whitney <i>U</i> -test       | 0.5620  |
| Figure S7<br>* <i>p</i> < 0.05<br>** <i>p</i> < 0.01<br>*** <i>p</i> < 0.001 | A, B                  | 10 mM suc.                                         | Mann-Whitney <i>U</i> -test       | 0.305   |
|                                                                              |                       | 10 mM suc. + yeast odor                            | Mann-Whitney <i>U</i> -test       | 0.661   |
|                                                                              |                       | 10 mM suc. + yeast odor + 5                        | Unpaired Student's <i>t</i> -test | 0.036   |
|                                                                              |                       | 10 mM suc. + yeast odor + 10                       | Mann-Whitney <i>U</i> -test       | 0.043   |
|                                                                              |                       | 10 mM suc. + yeast odor + 20                       | Unpaired Student's <i>t</i> -test | 0.001   |
|                                                                              |                       | 10 mM suc. + yeast odor + 40                       | Unpaired Student's <i>t</i> -test | 0.001   |
|                                                                              |                       | 10 mM suc. + yeast odor + 100                      | Mann-Whitney <i>U</i> -test       | 0.003   |
|                                                                              |                       | 10 mM suc. + yeast odor + 500                      | Unpaired Student's <i>t</i> -test | <0.0001 |

|                                 |   |                               |                                   |         |
|---------------------------------|---|-------------------------------|-----------------------------------|---------|
|                                 |   | 10 mM suc. + yeast odor + 750 | Unpaired Student's <i>t</i> -test | 0.001   |
| Figure S8<br>* <i>p</i> < 0.001 | F | <i>w</i> <sup>1118</sup>      | Unpaired Student's <i>t</i> -test | <0.0001 |
|                                 |   | <i>Piezo</i> <sup>K.O</sup>   | Unpaired Student's <i>t</i> -test | <0.0001 |
|                                 | G | <i>w</i> <sup>1118</sup>      | Mann-Whitney <i>U</i> -test       | <0.0001 |
|                                 |   | <i>Piezo</i> <sup>K.O</sup>   | Unpaired Student's <i>t</i> -test | <0.0001 |

Kru-Mann-Bon: Kruskal-Wallis with Mann-Whitney *U*-tests combined with Bonferroni-Corrections

MC: methyl cellulose

## SI Reference

1. J. C. Tuthill, R. I. Wilson, Mechanosensation and Adaptive Motor Control in Insects. *Curr Biol* **26**, R1022-r1038 (2016).
